# Supplementary material for: Quantifying the contribution of forcing and three prominent modes of variability on historical climate
Source: Copernicus journal article supplement (doi:10.5194/cp-2022-55), 2022-08-09
Supplement: Supplementary file 1 [file cp-2022-55-supplement.pdf]

**Supplementary Information**  
**for**  
**Quantifying the contribution of forcing and three prominent modes of**  
**variability on historical climate**

5 Andrew P. Schurer<sup>1\*</sup>, Gabriele C. Hegerl<sup>1</sup>, Hugues Goosse<sup>2</sup>, Massimo A. Bollasina<sup>1</sup>, Matthew H. England<sup>3</sup>, Michael J. Mineter<sup>1</sup>, Doug M. Smith<sup>4</sup> and Simon F. B. Tett<sup>1</sup>

<sup>1</sup>School of GeoSciences, University of Edinburgh, Edinburgh, EH9 3JW, United Kingdom

<sup>2</sup>Université Catholique de Louvain, Georges Lemaître Centre for Earth and Climate Research, Earth and Life Institute, Louvain-La-Neuve, B-1348, Belgium

10 <sup>3</sup>ARC Centre of Excellence for Climate System Science, University of New South Wales, New South Wales 2052, Australia

<sup>4</sup>Met Office Hadley Centre, Exeter, EX1 3PB, United Kingdom

*Correspondence to:* Andrew Schurer (a.schurer@ed.ac.uk)

**Introduction**

This document contains figures which support the findings made in the main paper by either exploring the sensitivity of the  
15 analyses to choices made or by illustrating points that could aid understanding of the material presented in the main paper.

## Figures

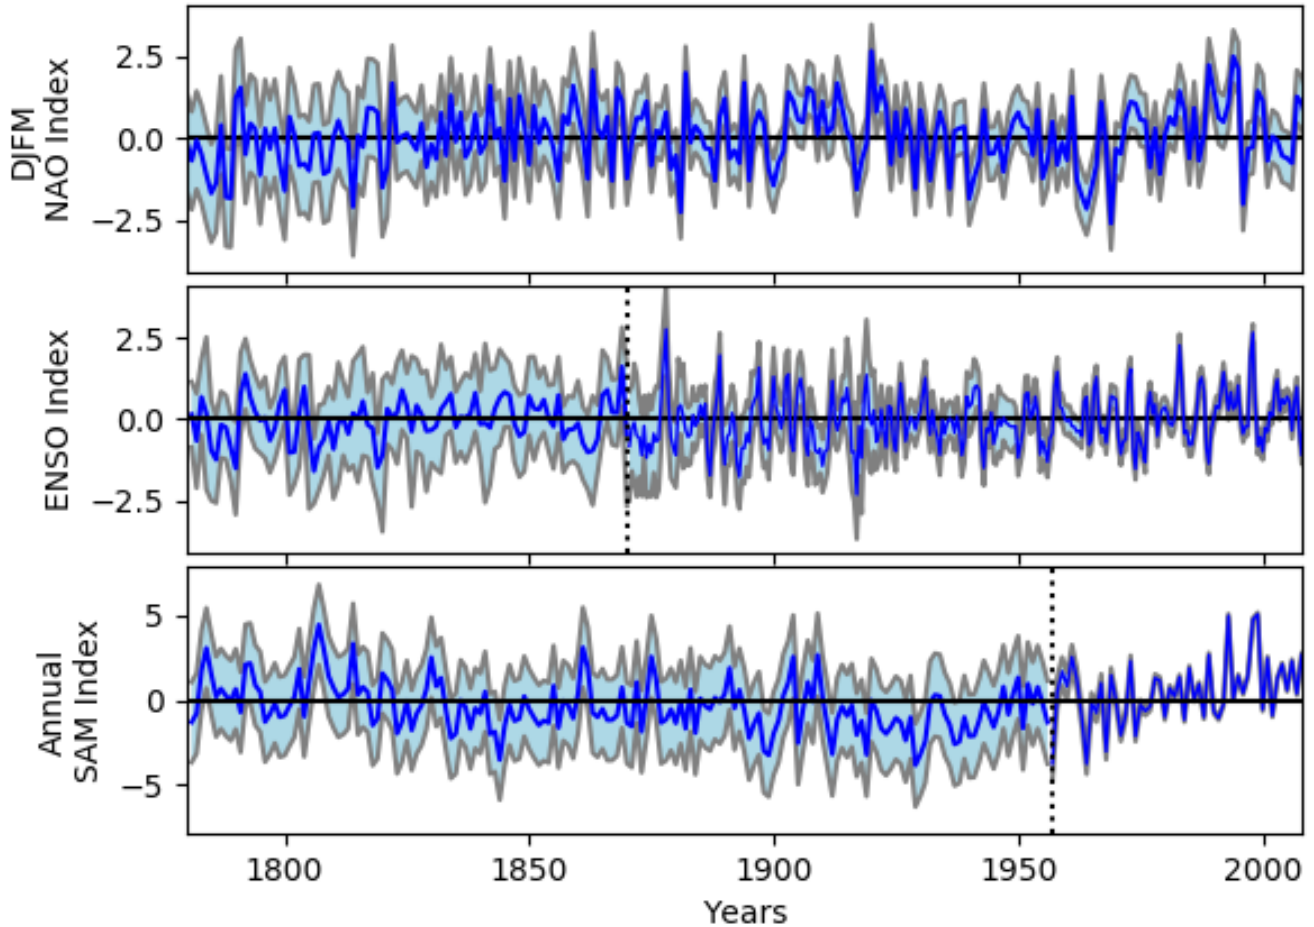

**Figure S1 – The target metrics with uncertainties (2 standard deviations).** Top panel – time-series *NAO (DJFM) mean* 1781-2000 from Luterbacher et al. (2001) and 2001-2008 from 20CR (Compo et al. 2011), uncertainty based on Luterbacher et al. (2001); **Middle panel** *ENSO index*. 1781-1881 – (NDJF) mean of reconstructions of Emile-Geay et al. (2013) and (Li et al. 2013) with uncertainty range calculated from combining the two ranges in quadrature. 1882-2008, two values per year: the mean from April to September and the mean of the index from October to March, instrumental mean and uncertainty from HadSST2 (Kennedy et al. 2011a, Kennedy et al. 2011b). **Bottom panel** *SAM proxy reconstruction (1781-1956) mean and uncertainty range* is Abram et al. (2014). 1957-2008 mean Marshall Index (Marshall 2003) with uncertainties calculated from the spread of 20CR ensemble members.

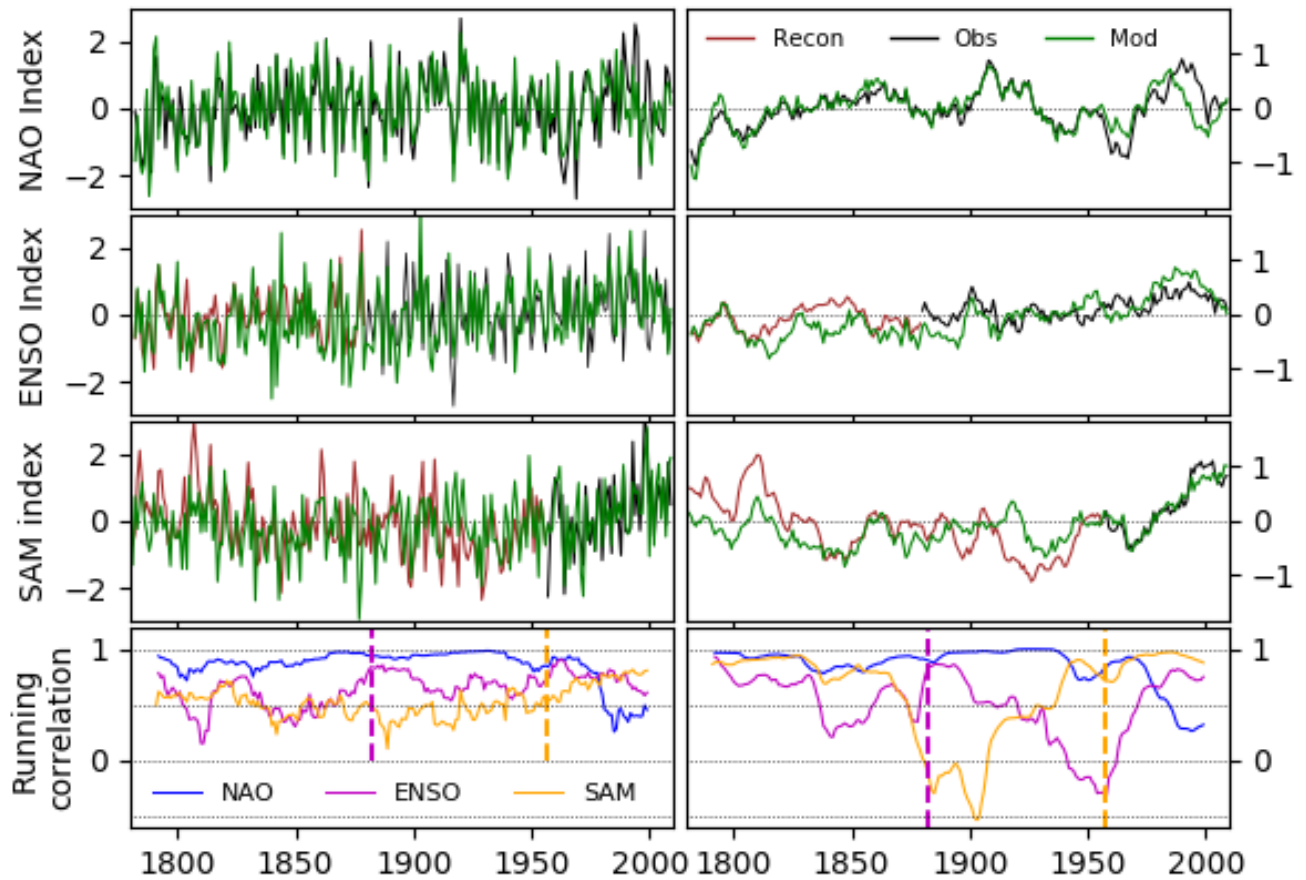

**Figure S2 – Performance of filter (same as fig 3 except for continuous particle)**– Top three panels – time-series of target metrics, *NAO (DJFM, climatology period 1782-2008)*, *ENSO (NDJF, climatology period 1882-1992)*, *SAM (Annual, climatology period 1957-1995)* for the continuous particle analysis (green), Reconstruction (orange), Instrumental Observations (black). Left column - annual values, right column – annual values smoothed by an 11 year running mean. Bottom panel shows, left – running 20- year correlation for the annual value, right – 40-year correlations for the smoothed values, vertical dashed line show the switch between proxy and instrumental values for ENSO (purple) and SAM (brown).

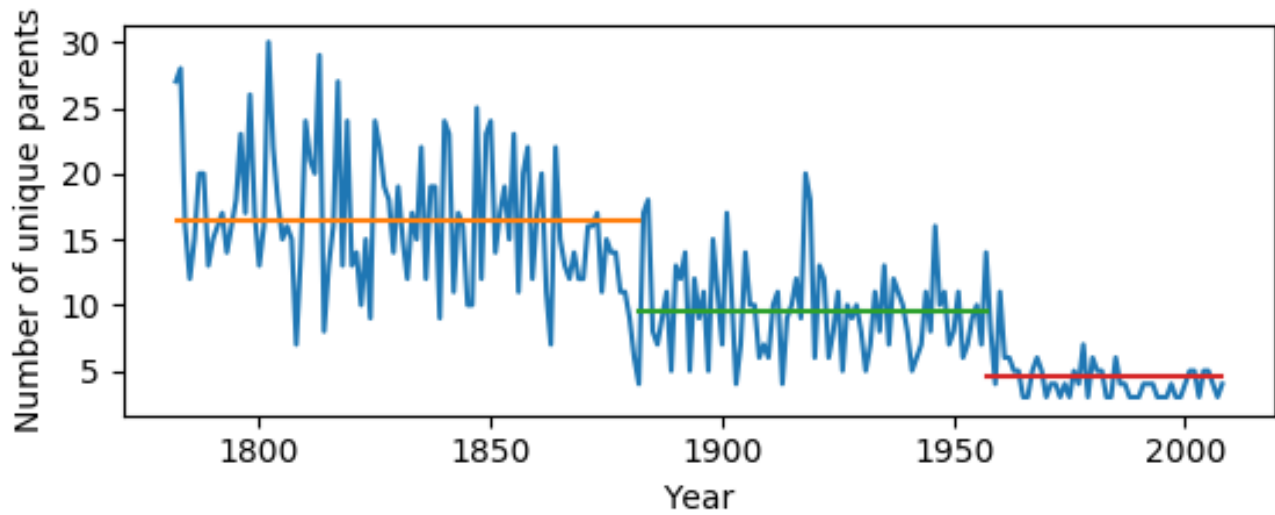

35 **Figure S3 – Number of particles re-spawned.** The horizontal lines show the mean of the period 1781-1881 (16.5 particles), 1882-1956 (9.6 particles) and 1957-2008 (4.5 particles). Indicating that as the uncertainties of the observed metrics decrease the filter has less and less particles which adequately match these modes within the uncertainties,

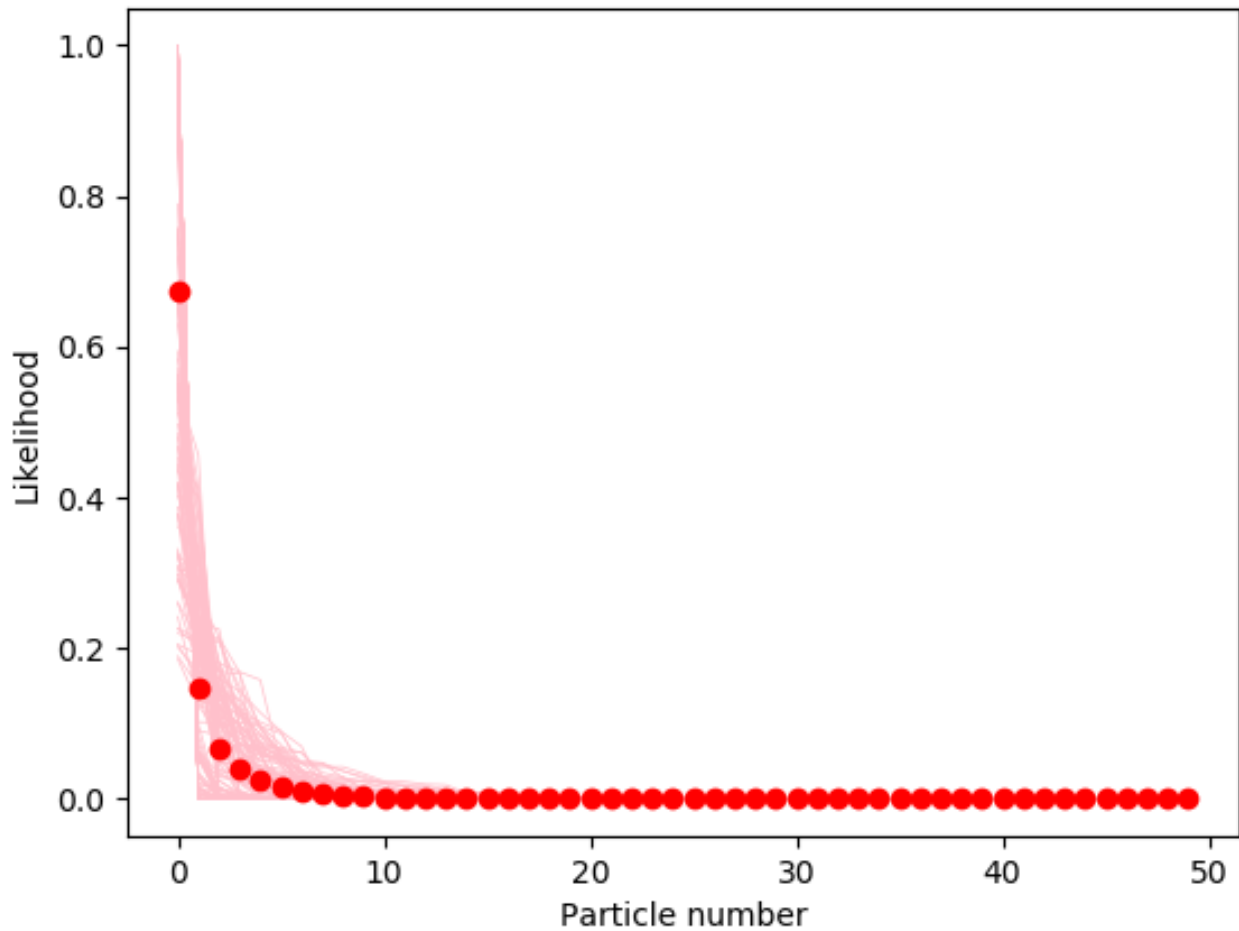

40 **Figure S4 – Likelihood distribution for the 50 particle members for all years between 1882-2008.** *Pink lines are the size-*  
*ordered likelihood distribution given by eq. 1 and red circles the mean over every year. So values plotted for particle #1 are*  
*for the most likely particle in that year, and particle #2 the second most likely, etc. The mean values are used to calculate the*  
*weighted mean of the forcing-only simulations used in figure 6 (note that for this, the likelihood of all particles less likely than*  
*the 10<sup>th</sup> are set to zero because there are only 10 forcing-only simulations to average and the remaining 10 particles divided*  
45 *by their sum so that the combined likelihood again sums to one. The first 10 particles encompass over 93% of the total*  
*likelihood).*

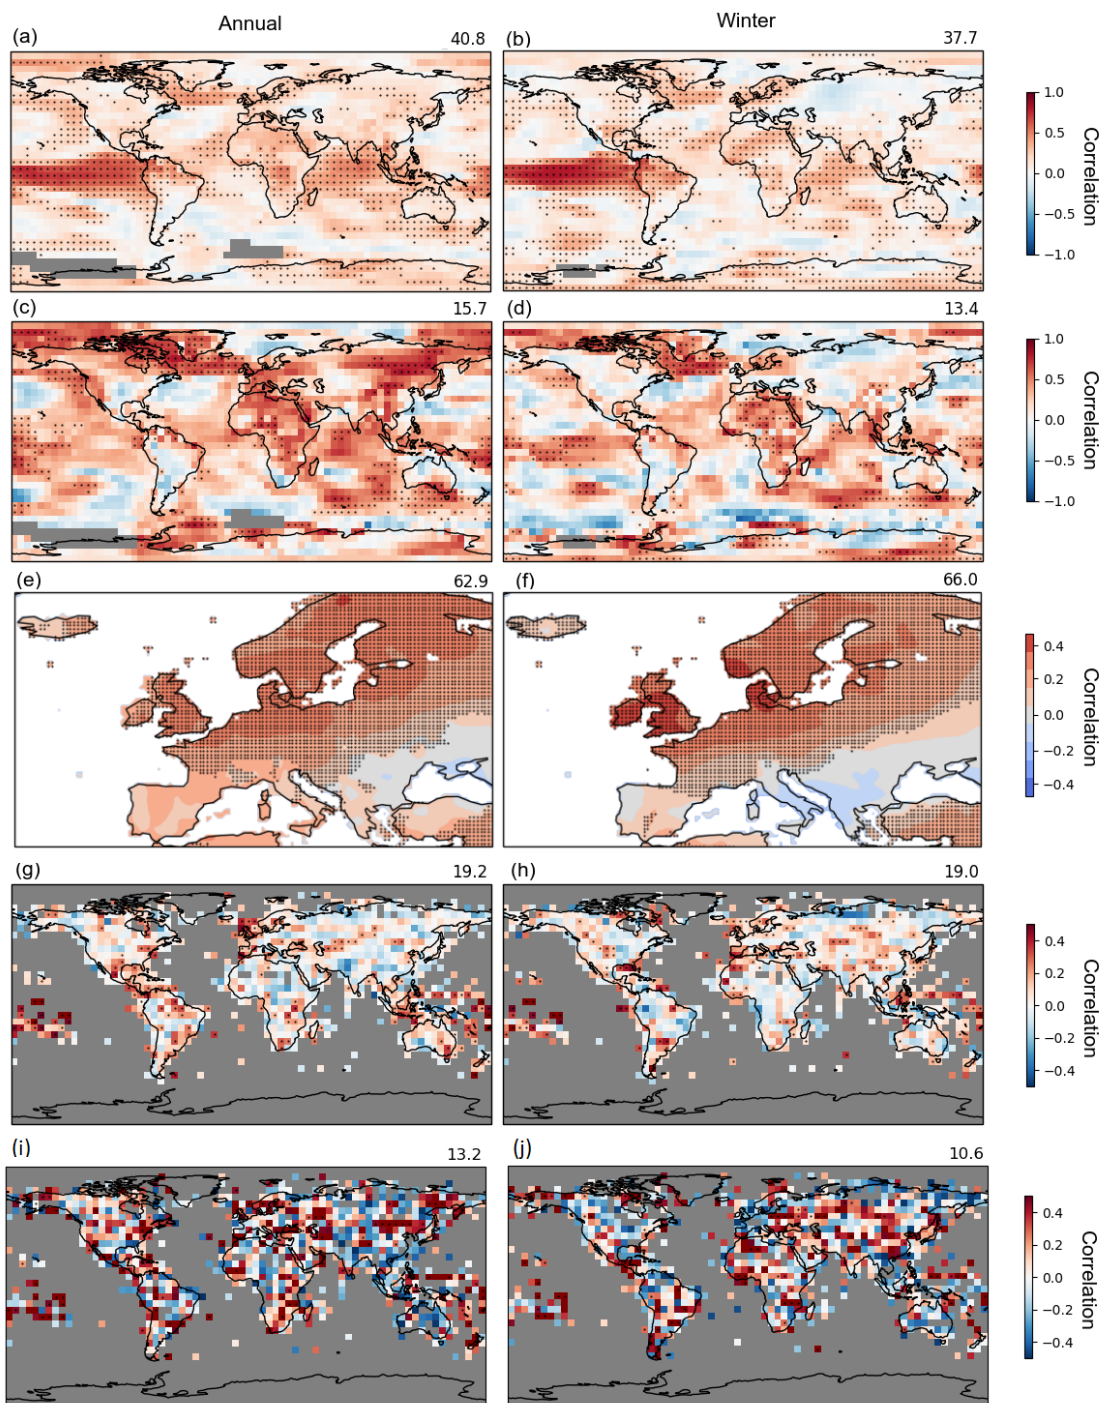

Figure S5 – Annual and winter (dJF) correlation between temperature in observations and assimilated model. As in figure 6 but correlations given as the raw correlations between assimilated model and observations rather than the improvement in correlation (with the correlation of the forced component removed).

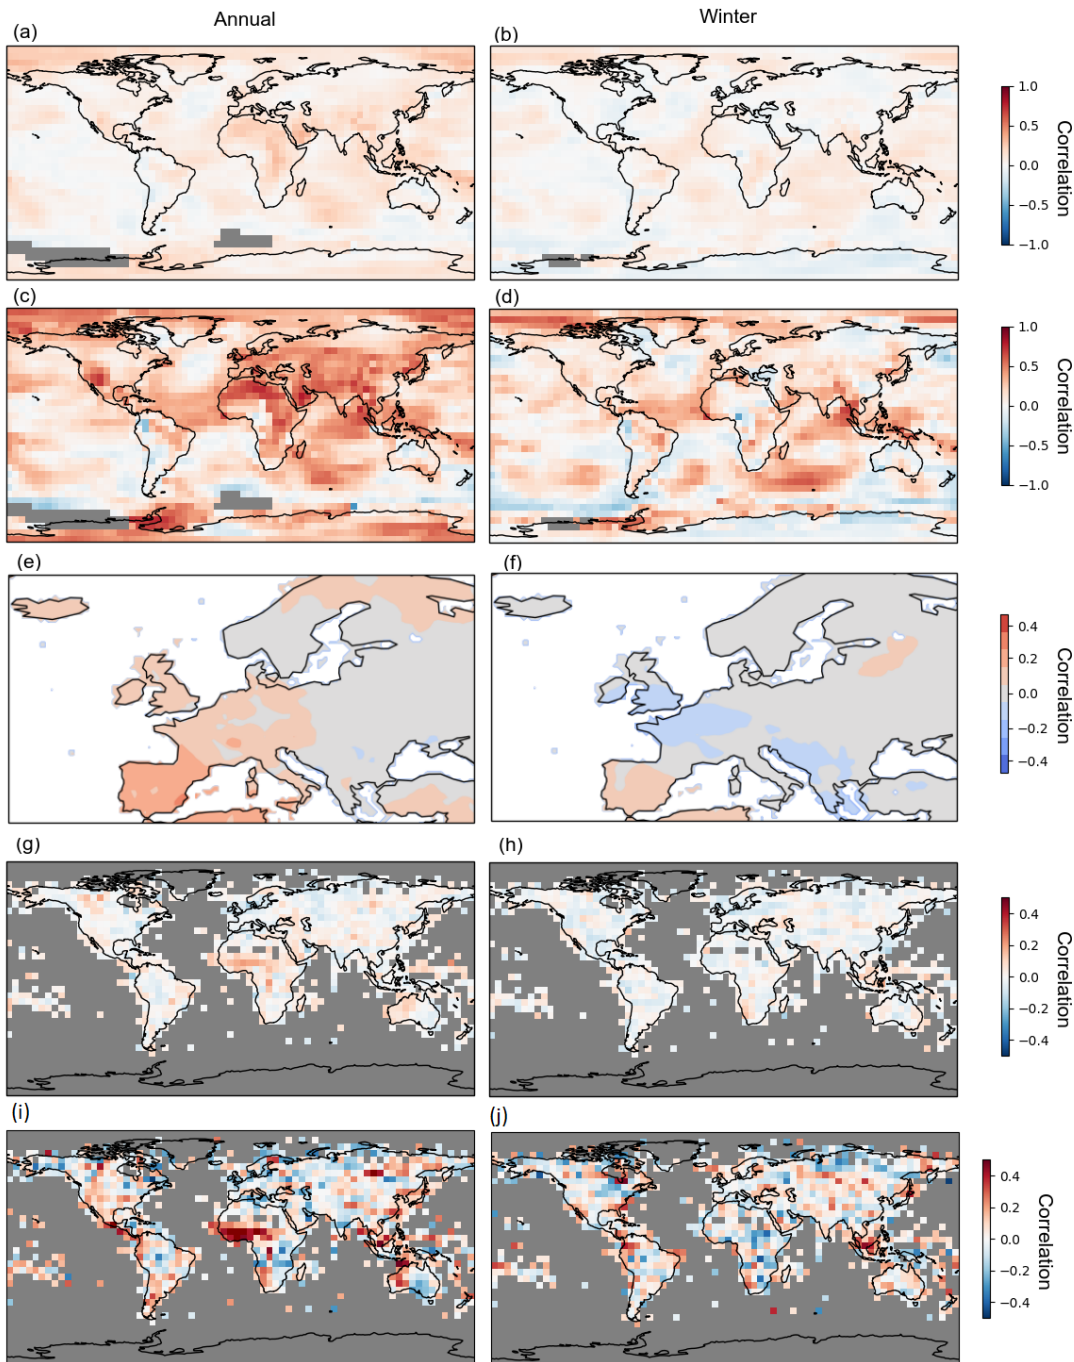

55 **Figure S6 – Annual and winter (djf) mean correlation between temperature in observations and a weighted mean of forcing-only model simulations (with no assimilation).** As in figure 6 but correlations given as the raw correlations between the weighted ensemble mean of the forcing-only simulations and observations, i.e. results show the forced component.

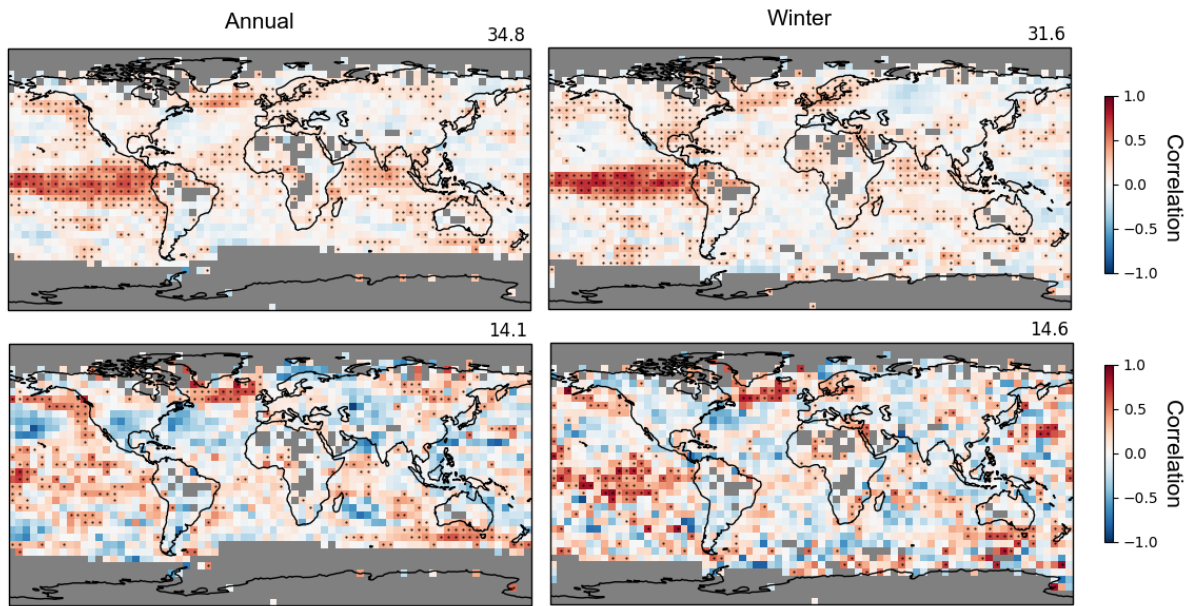

**Figure S7 – Improvement in annual and winter (djf) correlation between temperature in observations and assimilated model (with the forcing removed). Same as figure 6a-d except the correlations have been calculated against a version of**

60 *HadCRUT5 with no infilling.*



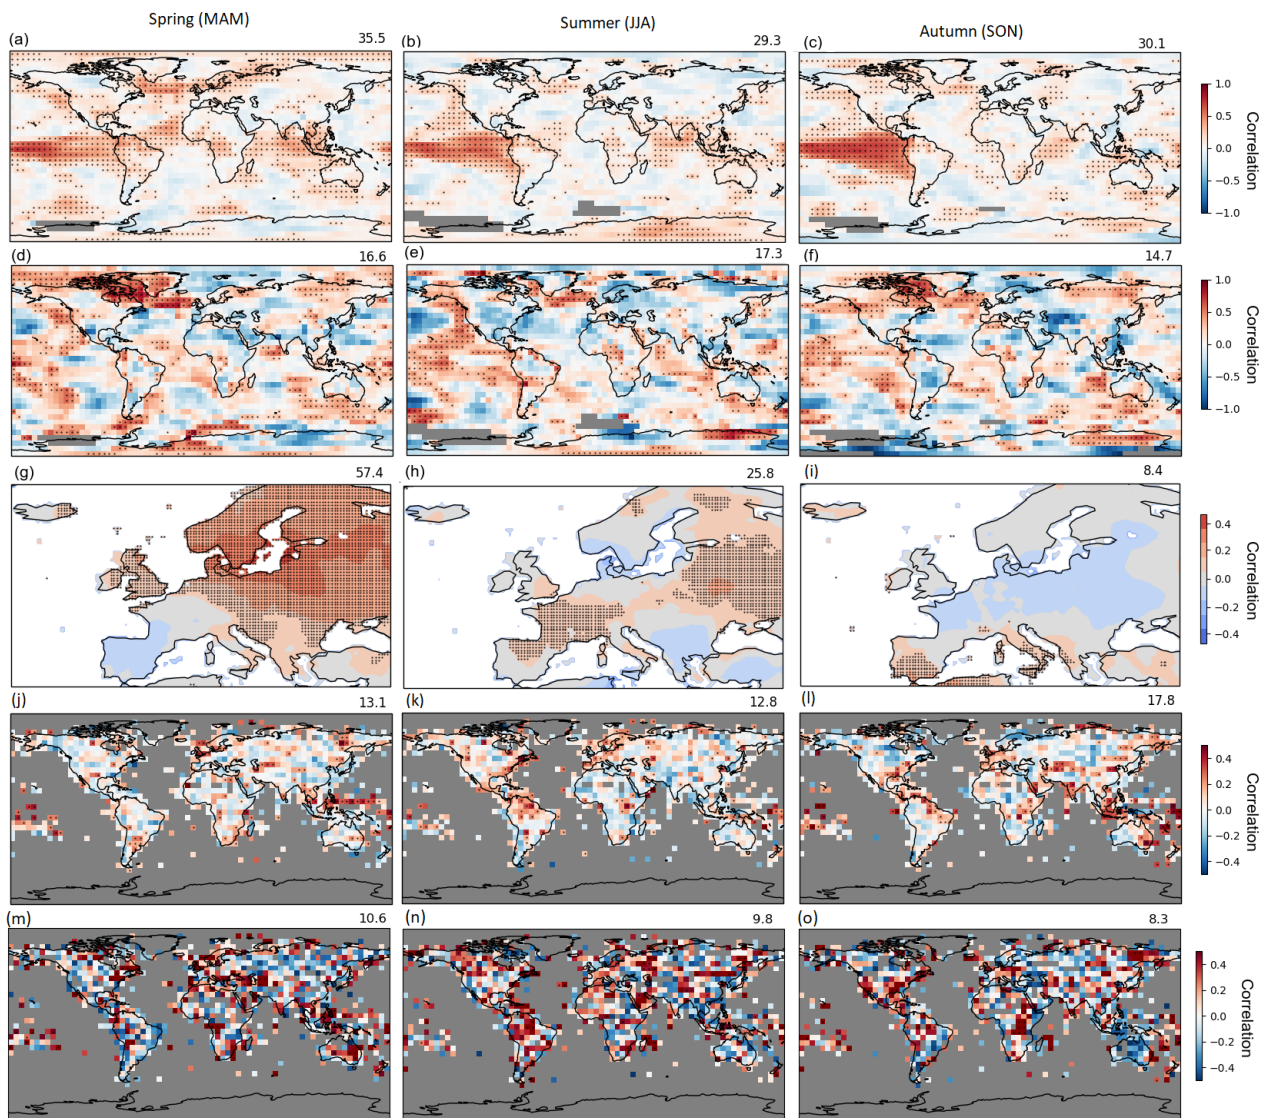

**Figure S8 – Improvement in correlation in Boreal spring (mam), summer (jja) and autumn (son).** *All panels the same as figure 6 but for different seasonal means.*

## References

- Abram, Nerilie J., Robert Mulvaney, Françoise Vimeux, Steven J. Phipps, John Turner, and Matthew H. England. 2014. "Evolution of the Southern Annular Mode during the Past Millennium." *Nature Climate Change* 4 (7): 564–69. <https://doi.org/10.1038/nclimate2235>.  
70
- Compo, G. P., J. S. Whitaker, P. D. Sardeshmukh, N. Matsui, R. J. Allan, X. Yin, B. E. Gleason, et al. 2011. "The Twentieth Century Reanalysis Project." *Quarterly Journal of the Royal Meteorological Society* 137 (654): 1–28. <https://doi.org/10.1002/QJ.776>.
- Emile-Geay, Julien, Kimberly M. Cobb, Michael E. Mann, and Andrew T. Wittenberg. 2013. "Estimating Central Equatorial Pacific SST Variability over the Past Millennium. Part II: Reconstructions and Implications." *Journal of Climate* 26 (7): 2329–52. <https://doi.org/10.1175/JCLI-D-11-00511.1>.  
75
- Kennedy, J J, N A Rayner, R O Smith, D E Parker, and M Saunby. 2011a. "Reassessing Biases and Other Uncertainties in Sea-Surface Temperature Observations Measured in Situ since 1850, Part 1: Measurement and Sampling Uncertainties." <http://www.bom.gov.au/jcomm/vos/>.
- . 2011b. "Reassessing Biases and Other Uncertainties in Sea-Surface Temperature Observations Measured in Situ since 1850, Part 2: Biases and Homogenisation." <http://www.metoffice.gov.uk/hadobs>.  
80
- Li, Jinbao, Shang Ping Xie, Edward R. Cook, Mariano S. Morales, Duncan A. Christie, Nathaniel C. Johnson, Fahu Chen, et al. 2013. "El Niño Modulations over the Past Seven Centuries." *Nature Climate Change* 3 (9): 822–26. <https://doi.org/10.1038/nclimate1936>.
- Luterbacher, J., E. Xoplaki, D. Dietrich, P. D. Jones, T. D. Davies, D. Portis, J. F. Gonzalez-Rouco, et al. 2001. "Extending North Atlantic Oscillation Reconstructions Back to 1500." *Atmospheric Science Letters* 2 (1–4): 114–24. <https://doi.org/10.1006/asle.2001.0044>.  
85
- Marshall, GJ. 2003. "Trends in the Southern Annular Mode from Observations and Reanalyses." *J. Clim.* 16: 4134–43. [https://doi.org/10.1175/1520-0442\(2003\)016<4134:titsam>2.0.co](https://doi.org/10.1175/1520-0442(2003)016<4134:titsam>2.0.co).
