# Supplementary material for: Quantifying the contribution of forcing and three prominent modes of variability on historical climate
Source: Copernicus journal article supplement (doi:10.5194/cp-2022-55), 2022-08-09
Supplement: Supplementary file [file cp-2022-55-AC1-supplement.pdf]

## Reviewer #1

**Thank you for your constructive and positive review. We will discuss each of your specific points below, with our replies written in bold.**

Major comments:

Line 104 – how does the choice to stop the simulations on April 1 affect the results? Would the results differ if you used a different month?

**This is an interesting question. We decided to stop the simulation and to perform the assimilation step on April 1 because the majority of the indices assimilated are winter indices (in particular the NAO and to a lesser extent the ENSO), so it seemed most logical that this was done after the end of winter period assimilated. Thus the simulations are restarted from initial conditions which best agreed with the winter period which had just occurred. In the revised manuscript we will ensure that this point is clear in the text. There are a number of different ways the experiment could have been set up but due to computational limitations we were not able to explore this fully.**

Figures – in general the use of red and green is not good for colorblind people. Please update the colorschemes. There are online tools to check whether a Figure is readable if someone is colorblind.

**Good point – thanks for bringing this to our notice – all figures this applies to will be updated, and the green line representing the assimilated simulations will be replaced by a blue line in all instances (including the supplementary information).**

Figure 3 – the red and green and black lines are hard to distinguish – perhaps the use of dots or dashes for those plotted on top of others would help.

**We thank the reviewer for this suggestion – but after careful consideration we do not think that dotted or dashed lines will clearly show the variability. We will however change the green line to blue – in response to the comment above – and will try to ensure that this figure is as clear as possible.**

Figure 4/5 – I recommend adding panels where differences are taken – this would be much easier to interpret

**The purpose of this figure was not only to show how similar the models and the observations are but also to show what the pattern is. The pattern itself is crucial to understand the performance of the experiments as they show which regions you could expect to be influenced by the assimilation. We therefore propose keeping the figure as is, but we will also add a figure showing the difference in the patterns to the supplement.**

Figure 6 – Why are you looking at boreal winter alone?

**For the main figures we concentrate on boreal winter as this is the season which contains the most assimilated data, we will add a short statement to the text to make this clear. The other seasons are shown in figure S8.**

The bottom two panels are hard to interpret – would smoothing help?

***This is a good idea – but given that the figure is already effectively smoothed by the use of a running correlation – we consider that this would make the figure harder to interpret so we would like to keep the figure as it is.***

Figure 7 -

The caption says this is Annual and DJFM but I only see one result.

***Thank you for pointing this out – we will update the caption.***

There is currently no panel (g)

***Thank you for spotting this– we will update the labelling.***

**Minor comments:**

Line 35 – should also cite the original paper by Hawkins and Sutton, 2009:  
[https://journals.ametsoc.org/view/journals/bams/90/8/2009bams2607\\_1.xml](https://journals.ametsoc.org/view/journals/bams/90/8/2009bams2607_1.xml)

***This will be included***

Line 45 needs citation:

Some options:

<https://www.nature.com/articles/s41558-020-0731-2>

<https://link.springer.com/article/10.1007/s00382-010-0977-x>

***These will be included - thanks***

Overview of large ensemble literature – could be useful for lines 40-45:

<https://esd.copernicus.org/articles/12/401/2021/>

***We will add this citation to what was line 40.***

Line 80 – first thought is can we really trust data from 1781 – I see later you use reconstructions, this is great but perhaps needs to be mentioned earlier on line 80.

***We will add the following lines to the introduction – so hopefully this point will be clear from early on “For the start of the simulations the modes assimilated will mainly rely on proxy reconstructions with instrumental observations used later when it becomes available”***

Line 118 – remove repeated word “schematically”

***This will be done, thanks***

Line 225 – tell the read which color this is in brackets for ease of interpretation

***This will be done, thanks***

Line 299 – could this lack of variability in the Southern Ocean be due to the coarse resolution of the model?

**Yes this could be one possibility and note that this was suggested by Beadling et al (2020). We will highlight this by adding the wording “potentially due to the relatively coarse resolution”**

Section 3.3 either be clear that you refer to only tropical eruptions or add citations for high-latitude eruptions: some are as follows

<https://www.pnas.org/doi/10.1073/pnas.1509153112>

<https://esd.copernicus.org/articles/12/975/2021/>

<https://www.cesm.ucar.edu/projects/community-projects/LME/publications/Stevenson-JClimate-2016.pdf>

***We agree that this would be good to clarify so we will add a sentence on high latitude eruptions with some of the references you suggest cited.***

Line 316 – another possible citation

<https://www.nature.com/articles/s41467-022-28210-1>

**Thanks we will add this as well**

Section 3.3 – there is a review on this topic:

<https://agupubs.onlinelibrary.wiley.com/doi/chapter-epub/10.1002/9781119548164.ch12>

**Thanks this is a useful reference and will be added**

Line 354: Does this relate to these results:

<https://agupubs.onlinelibrary.wiley.com/doi/full/10.1002/2015GL066608>

Line 363 – can you say why?

**The question of why this model (like the majority of models) does not capture the correct ENSO response is an important question but we feel it is outside the scope of this paper.**
