# Supplementary material for: Quantifying the contribution of forcing and three prominent modes of variability on historical climate
Source: Copernicus journal article supplement (doi:10.5194/cp-2022-55), 2022-08-09
Supplement: Supplementary file [file cp-2022-55-AC2-supplement.pdf]

## **Reviewer #2**

**We are grateful to the reviewer for their positive comments. The reviewer wrote:**

The only concern I have is that the verification of the DA only includes the correlation metric, which by its nature does not provide any information about bias. I think the authors ought to provide, at least in the supplement, some verification metric that incorporates bias, such as 'bias' or 'mean absolute error' or 'continuous-ranked probability score'. So I am suggesting a verification just like Fig 6 but for an additional metric. This will allow for a more complete assessment of the limitations of the DA product.

**This is a good idea and we agree that this suggestion represents a useful test of the model and one which will improve the interpretation of our results. We will therefore add a figure showing mean absolute error to the supplement.**
